# Supplementary material for: Orientation-specific RAG activity in chromosomal loop domains contributes to Tcrd V(D)J recombination during T cell development
Source: PubMed Central journal article supplement — J Exp Med. 2016 Aug 22;213(9):1921–36. doi: 10.1084/jem.20160670 (PMC4995090; doi:10.1084/jem.20160670), 2016-08-22
Supplement: supp_jem.20160670_JEM_20160670_sm.pdf [file supp_jem.20160670_JEM_20160670_sm.pdf]

SUPPLEMENTAL MATERIAL

Zhao et al., <http://www.jem.org/cgi/content/full/jem.20160670/DC1>

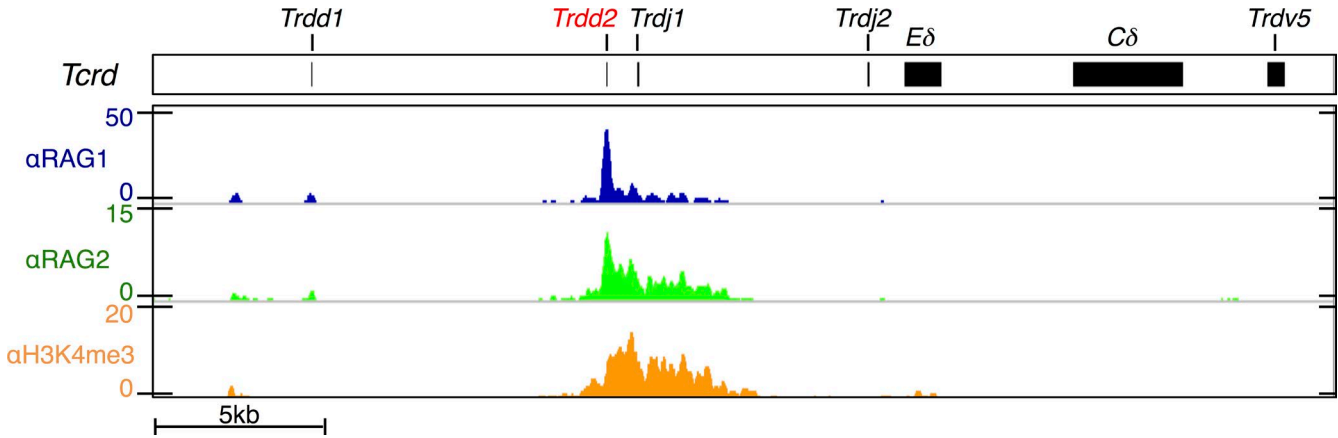

Figure S1. **High-level enrichment of RAG binding and H3K4me3 at *Trdd2*.** IGV plot displaying RAG1, RAG2, and H3K4me3 ChIP-seq profile from D $\beta$  CD4<sup>+</sup>CD8<sup>+</sup> pre-T cell thymocytes. The D $\beta$  mouse is deficient for endogenous RAG1, but harboring a catalytically dead RAG1 (D708A) mutant that retains its DNA-binding properties, and also expresses a Tcr $\beta$  transgene.

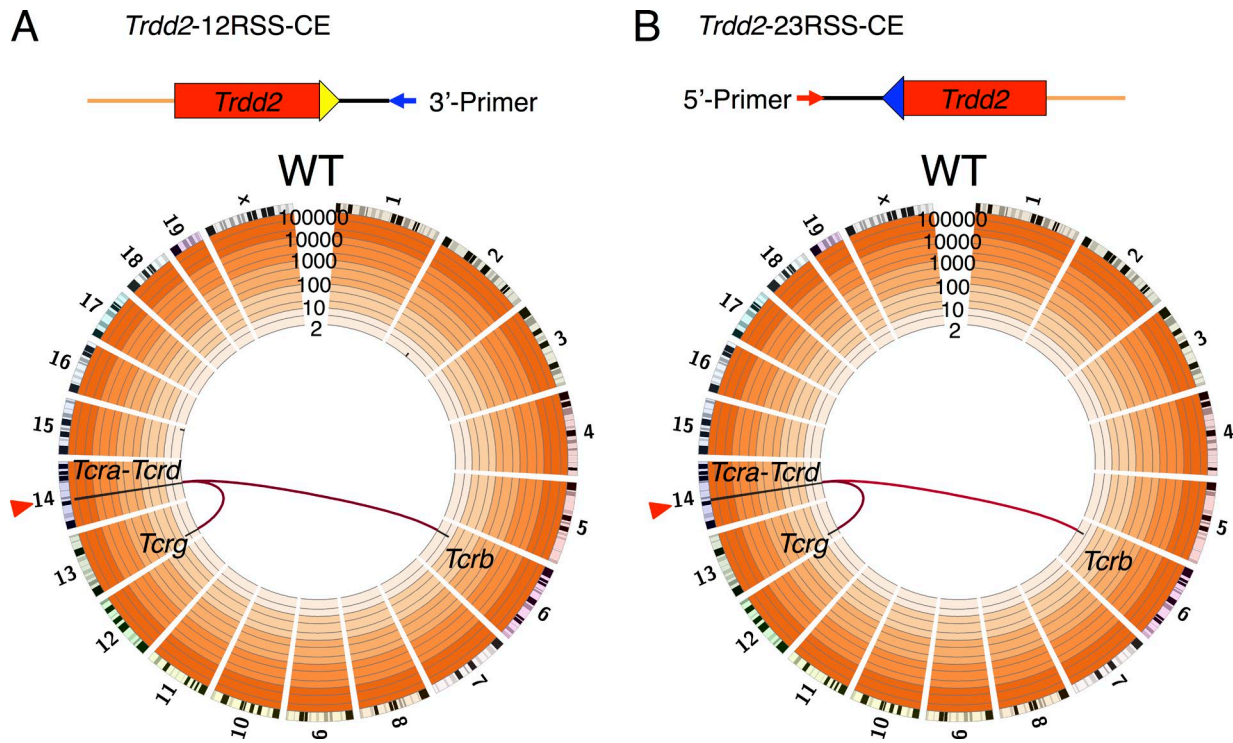

Figure S2. **Genome-wide distribution of prey junctions from *Trdd2* 12RSS and 23RSS CE libraries.** (A and B, top) Schematic of junction reads from 3'-Primer (A) or 5'-Primer (B). Bait primer (red or blue arrows), bait sequence (black lines), prey sequence (orange lines) are indicated. The relative position of 12RSS (blue triangle), 23RSS (yellow triangle) and *Trdd2* gene segment (red rectangle) are labeled. (bottom) Circos plots showing pooled WT *Trdd2*-12RSS-CE libraries ( $n = 3$ ; A) and WT *Trdd2*-23RSS-CE libraries ( $n = 4$ ; B). Red triangles indicate the *Trdd2* bait-site. Red lines link the *Trdd2* bait to *Tcr* loci hotspots. Bin size is 5 Mb (black bars). *Trdd2*-12RSS-CE and 23RSS-CE libraries were normalized to 76,966 and 106,193, respectively.

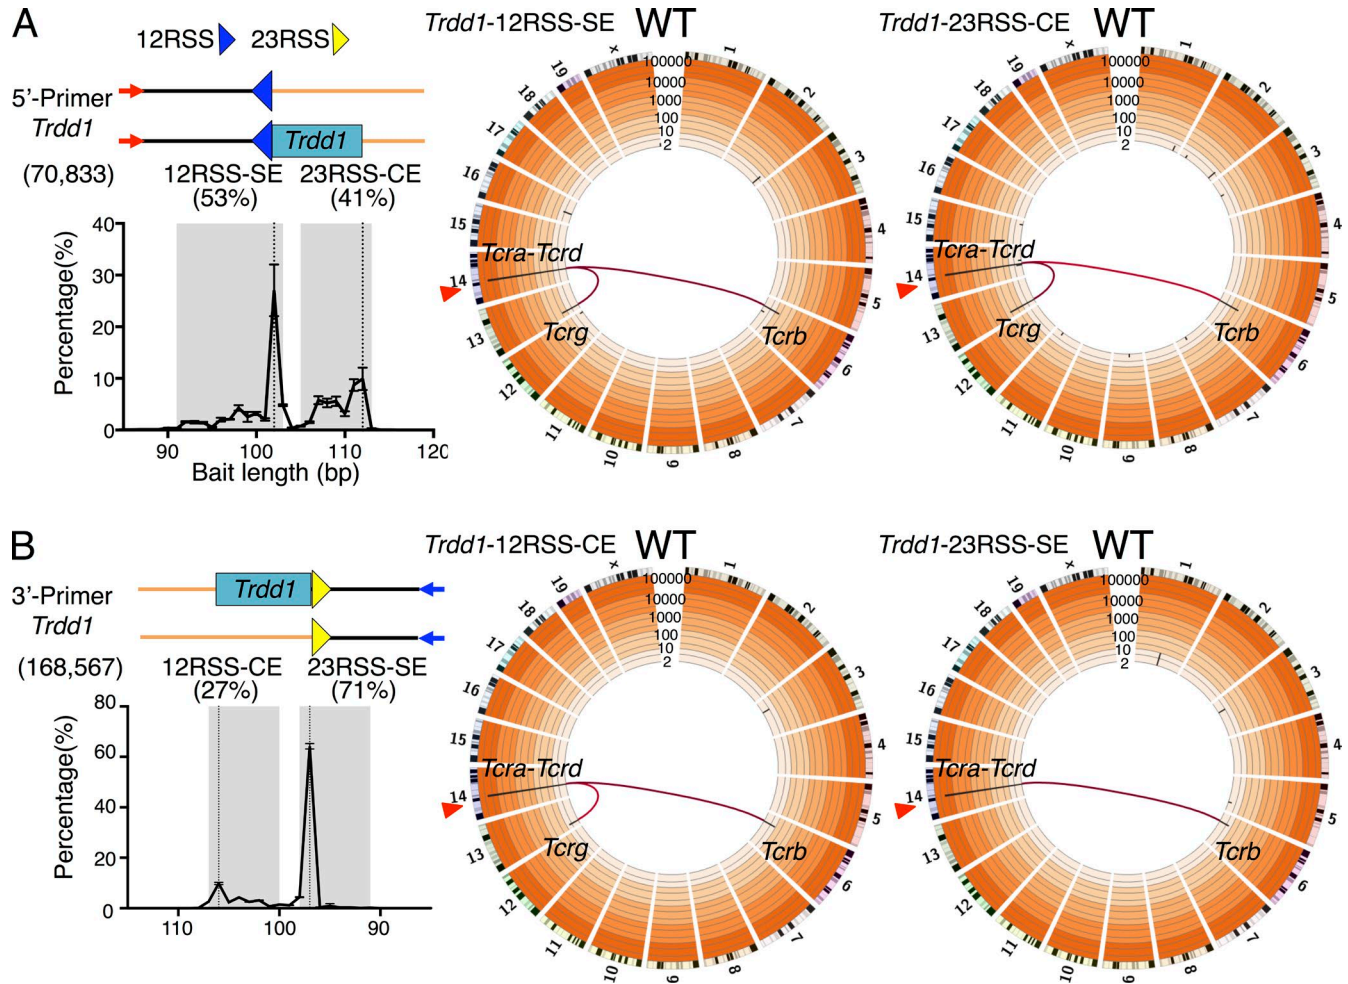

Figure S3. **Bait length and genome-wide prey junction distributions baited from RAG-initiated DSBs *Trdd1*.** (A and B, top left) Schematic of junction reads from 5'-Primer (A) or 3'-Primer (B). Bait primer (red or blue arrows), bait sequence (black lines), and prey sequence (orange lines) are indicated. The relative position of 12RSS (blue triangle), 23RSS (yellow triangle), and *Trdd1* gene segment (blue rectangle) are marked. (bottom left) Length distribution of bait sequence, plotted as the percentage of total junctions, corresponds to the relative position of the predicted bait break-sites (dotted lines). Total junctions analyzed are shown in parentheses. Percentages of total junctions in indicated range is shown above. (middle and right) Circos plots displaying genome-wide prey junction distribution from *Trdd1*-12RSS-SE (B;  $n = 3$ ; A, middle), *Trdd1*-23RSS-CE (B;  $n = 3$ ; A, right), *Trdd1*-12RSS-CE (C;  $n = 3$ ; B, middle), *Trdd1*-23RSS-SE (C;  $n = 3$ ; B, right) libraries. Bin size is 5 Mb (black bars); red lines linking the *Trdd1* bait (red triangle) to *Tcr* loci hotspots. *Trdd1*-12RSS-SE and *Trdd1*-12RSS-CE libraries are normalized to 70,833. *Trdd1*-23RSS-SE and *Trdd1*-23RSS-CE libraries are normalized to 168,567.

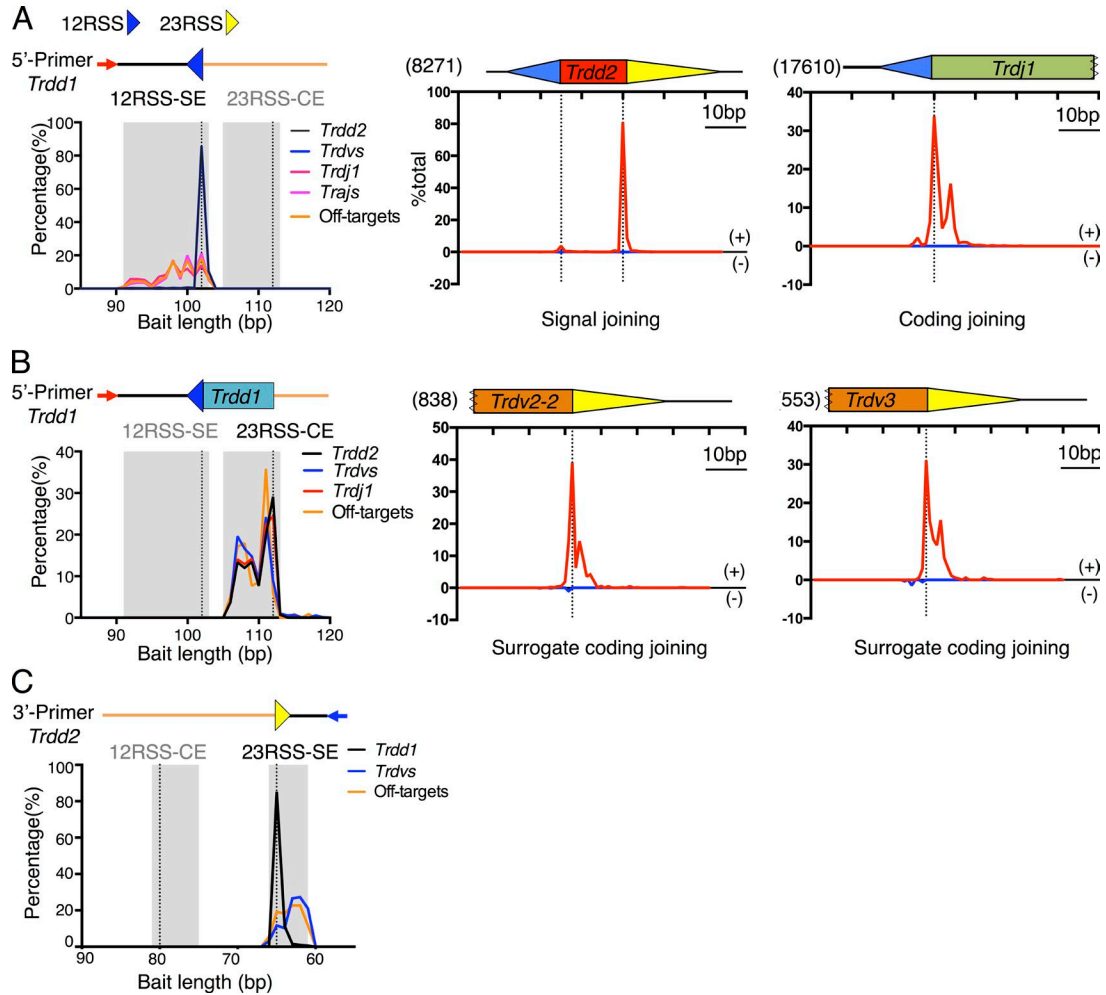

Figure S4. **Precise signal join and processed surrogate coding join examples.** (A–C, top left) Schematic of junction reads baited from *Trdd1*-12RSS-SE (A), *Trdd1*-23RSS-CE (B), or *Trdd2*-23RSS-SE (C). Bait primer (red or blue arrows), bait sequence (black lines), and corresponding prey sequence (orange lines) are indicated. The relative position of 12RSS (blue triangle), 23RSS (yellow triangle), and *Trdd1* gene segment (blue rectangle) are denoted. (bottom left) Length distribution of bait sequence with corresponding preys clustered within selected hotspot regions recovered from *Trdd1*-12RSS-SE (A), *Trdd1*-23RSS-CE (B), or *Trdd2*-23RSS-SE (C) libraries. Bait sequence length reflects processing of several nucleotides from bait BEs before end-joining. (A, left) Distribution of bait sequence length reveal precise signal joining patterns for prey ends at *Trdd2* and *Trdvs*. Prey ends at *Trdj1*, *Trajs* cluster and off-targets downstream of *Trdd1*, are lead by bait sequences with end-processing reminiscent of coding joining patterns. Linear distribution of prey junctions at *Trdd2* (middle) or *Trdj1* (right) recovered from *Trdd1*-12RSS-SE. (B, left) End-processing at bait sequences with corresponding preys at selected regions from *Trdd1*-23RSS-CE libraries. Distribution of prey junctions in *Trdv2-2* (middle) and *Trdv3* (right) from *Trdd1*-23RSS-CE bait libraries reflects end-processing from prey BE. (C) End-processing at bait sequences distinguishes corresponding preys at *Trdvs* and RAG off-targets resulting from secondary recombination events that occurred at chromosomally positioned *Trdd1*-12RSS/*Trdd2*-23RSS fusions (see Fig. 3 A for additional information). Red and blue lines in A and B (middle and right) represent + and – joining orientation, respectively.

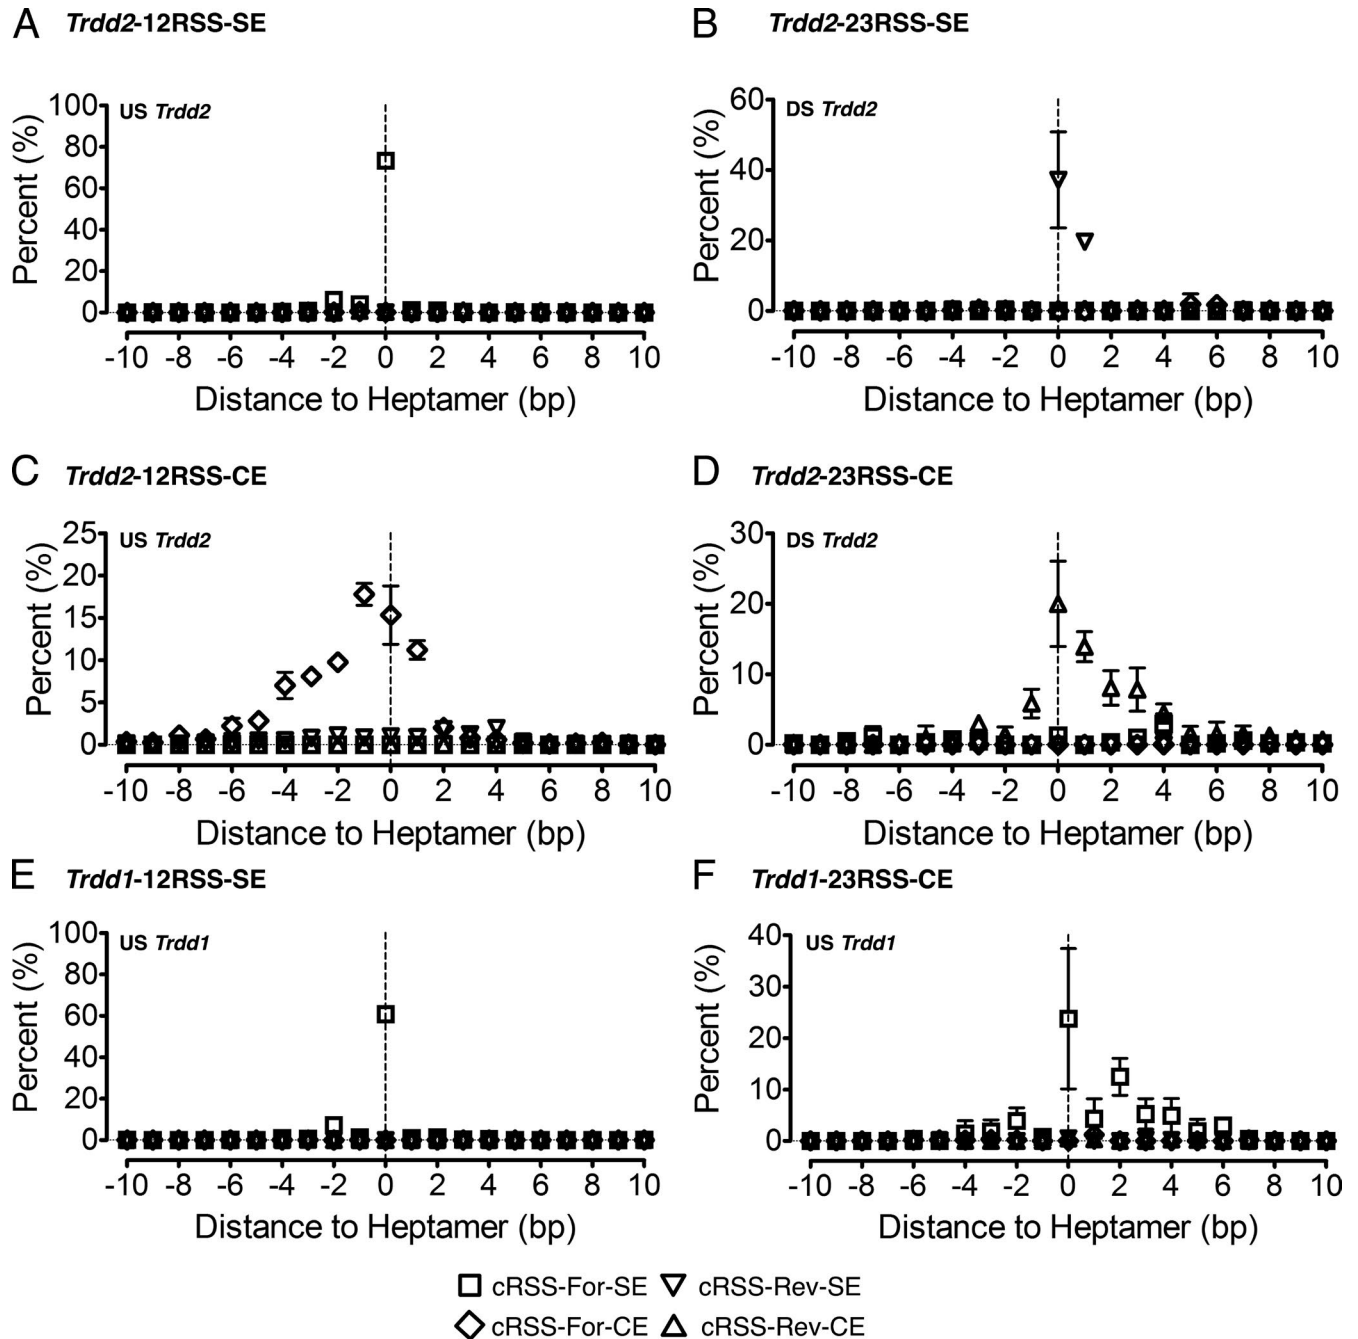

Figure S5. **Junctions not corresponding to bona fide RSS sites are associated with RAG off-targets.** (A–F) Distance of the junctions not corresponding to bona fide RSS sites to cRSS (CAC) in selected regions; junction percentages are from total junctions that are not corresponding to bona fide RSS sites. *Trdd2*-12RSS-SE (A;  $n = 4$ ); *Trdd2*-23RSS-SE (B;  $n = 3$ ); *Trdd2*-12RSS-CE (C;  $n = 3$ ); *Trdd2*-23RSS-CE (D;  $n = 4$ ); *Trdd1*-12RSS-SE (E;  $n = 3$ ); and *Trdd1*-23RSS-CE (F;  $n = 3$ ). US *Trdd2*, upstream region of *Trdd2* in CIL; DS *Trdd2*, downstream region of *Trdd2* in CIL; US *Trdd1*, upstream region of *Trdd1* in CIL; DS *Trdd1*, downstream region of *Trdd1* in CIL. cRSS-For-SE, + orientation joining at forward cRSS; cRSS-For-CE, – orientation joining at forward cRSS; cRSS-Rev-SE, – orientation joining at reverse cRSS; cRSS-Rev-CE, + orientation joining at reverse cRSS. Mean  $\pm$  SD from at least three independent libraries.

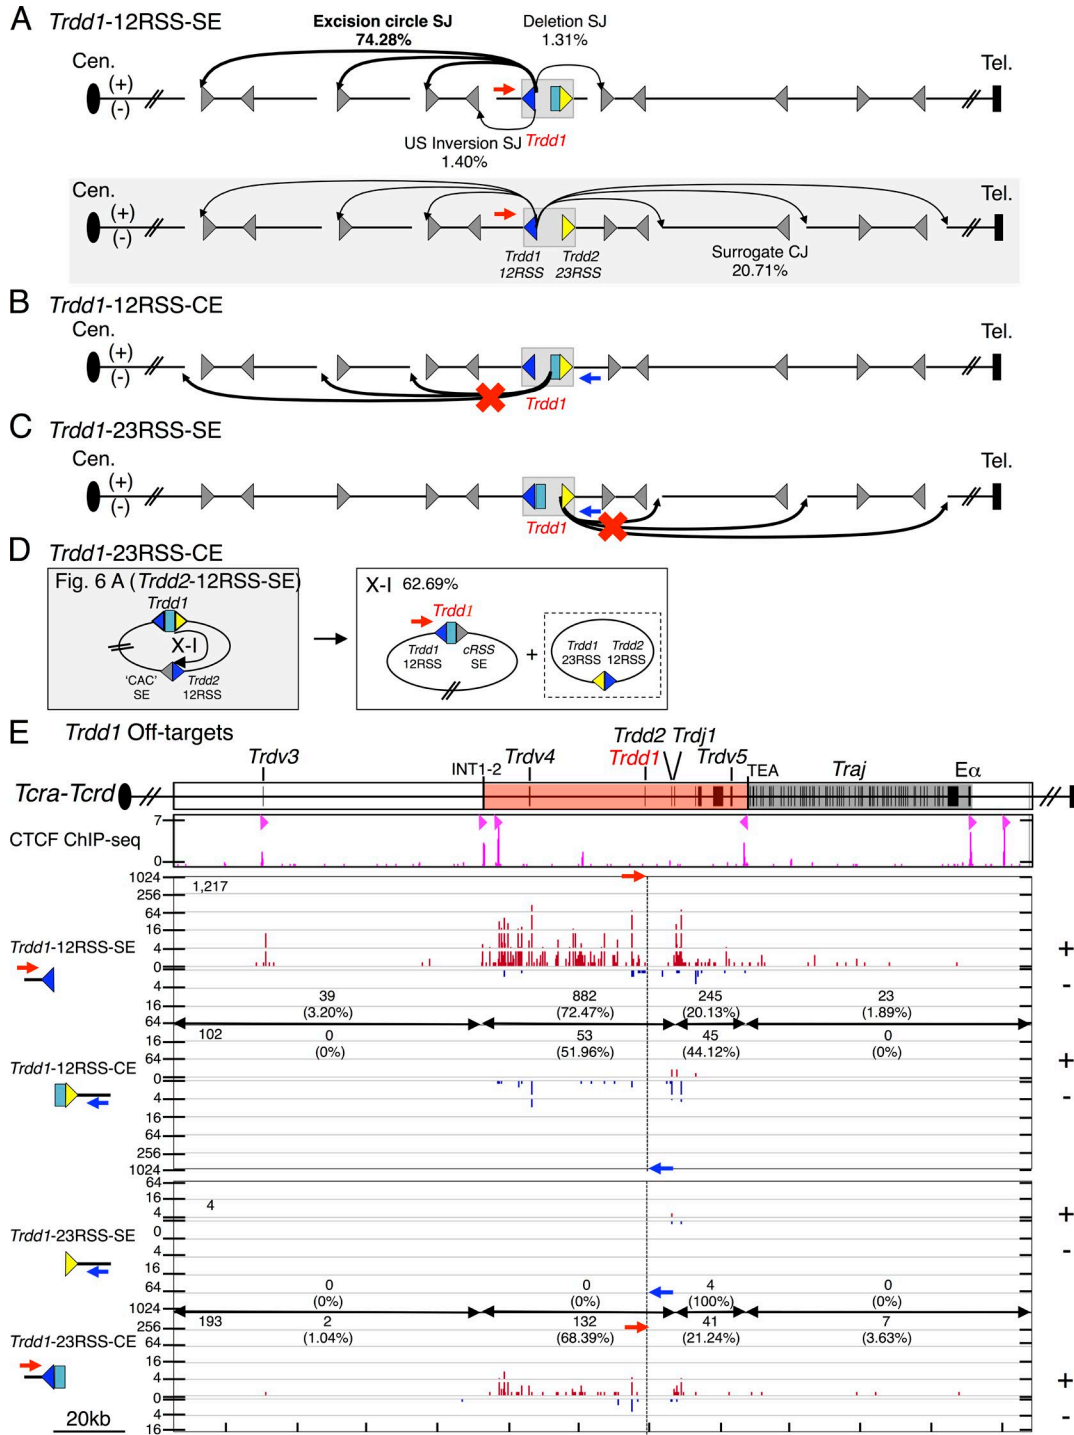

Figure S6. Profiles of off-targets baited from RAG-initiated DSBs at *Trdd1*. (A-D) Diagram illustrating joining outcomes to cRSS (CAC) sites (gray triangle) from *Trdd1*-12RSS-SE (A;  $n = 3$ ), -CE (B;  $n = 3$ ), *Trdd1*-23RSS-SE (C;  $n = 3$ ), and *Trdd1*-23RSS-CE (D;  $n = 3$ ) libraries. Joining outcomes baited from *Trdd1*-12RSS-SE in the fused *Trdd1*-12RSS/*Trdd2*-23RSS configuration to cRSSs is shaded in gray (A). Few RAG off-targets are detected by *Trdd1*-12RSS-CE (B) or *Trdd1*-23RSS-SE (C). RAG off-targets detected by *Trdd1*-23RSS-CE are secondary joining events that occurred in excision circle harboring *Trdd2*-12RSS-SE and cRSS signal joins (gray box; D). Junction percentages of total RAG off-targets in excision circle, deletion, upstream (US) inversion, and downstream (DS) inversion joining events are shown. 5'- (red arrow) and 3'-Primers (blue arrow) are indicated. Dotted line indicates the position of bait BEs. (E) Gene segment organization of the region between *Trdv3* and *E $\alpha$*  (3' portion of the *Tcra-Tcrd* locus). CIL (red) and *Traj* cluster (dark gray) is marked. (middle) ChIP-seq profile of CTCF. CBE orientation is marked by light red triangles. (bottom) IGV plots of *Trdd1* RSS bait RAG off-target junction distributions. Total RAG off-targets are listed in the top left corner for each bait. Junction numbers and percentages as of total RAG off-targets in indicated regions are shown.
